# Supplementary material for: Drug Resistance and Molecular Characteristics of Mycobacterium tuberculosis: A Single Center Experience
Source: MDPI journal article supplement (doi:10.3390/jpm12122088), 2022-12-19
Supplement: s1 [file s1]

## **Supplementary Materials**

### *2.6. H&E staining*

Cut 1 wax slice of FFPE specimen with 3um thickness. Baked at 72 degrees for 30 min, xylene for 10 min × 2 times, gradient ethanol for 5 min × 3 times, hematoxylin solution for 2 min, hydrochloric acid alcohol fractionation for 5 s, ammonia for 5 s, eosin Y solution for 10 s. After rapid dehydration in gradient ethanol and transparency in xylene for 3 times, the slice was sealed with neutral resin.
