# Supplementary figures and images for: Drug Resistance and Molecular Characteristics of Mycobacterium tuberculosis: A Single Center Experience
Source: MDPI journal article supplement (doi:10.3390/jpm12122088), 2022-12-19

Supplementary Materials

Figure S1. some mutation types on membrane strips.

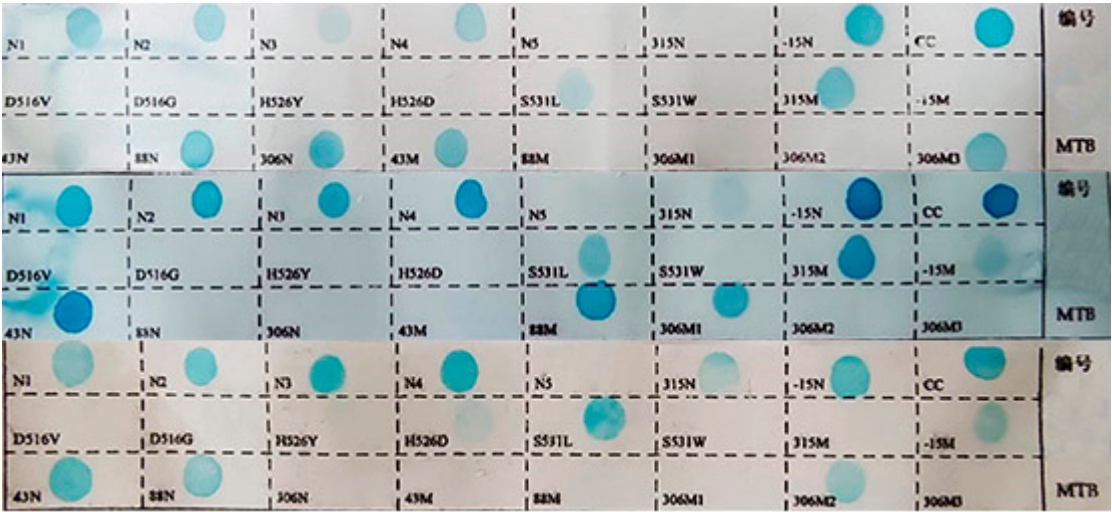

Supplement: s1 [file s1]
